# Supplementary material for: Dysbiosis: An Indicator of COVID-19 Severity in Critically Ill Patients
Source: MDPI journal article supplement (doi:10.3390/ijms232415808), 2022-12-13
Supplement: s1 [file s1]

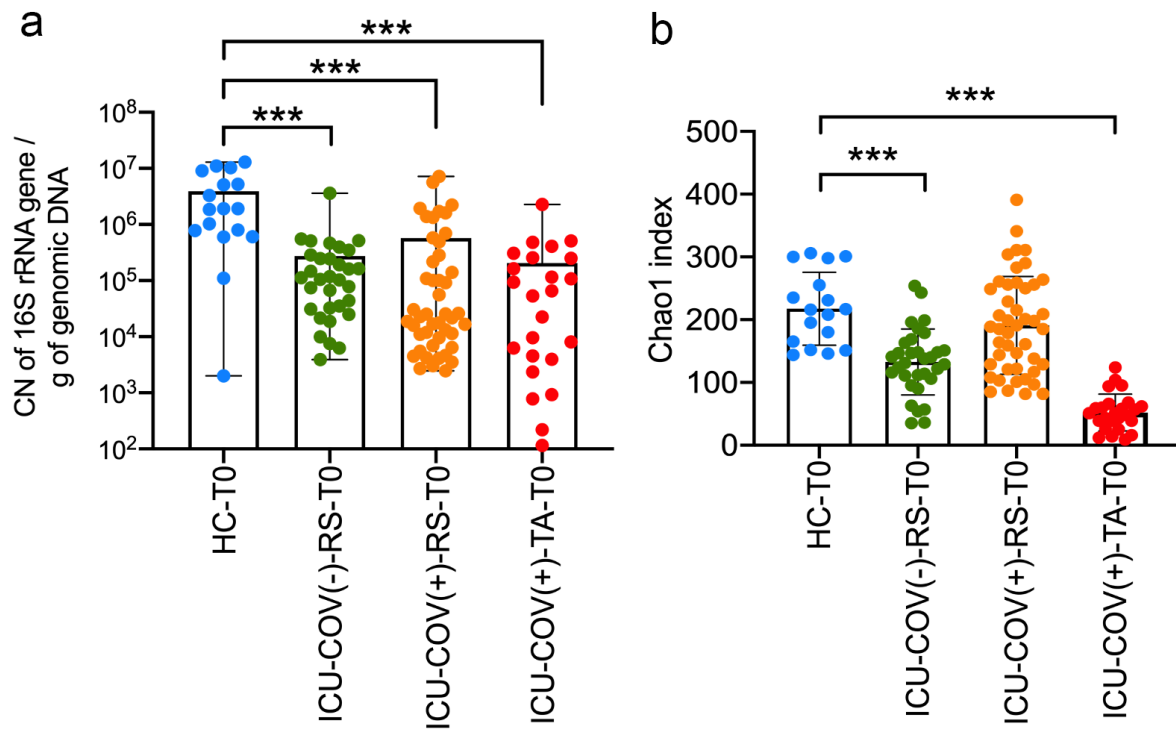

**Supplementary Figure S1. a**, Bacterial load in critically ill patients as assessed by qPCR of the V4 region of the 16S rRNA gene on ICU admission **b**, Bacterial richness as assessed by the Chao1 index analysis of the 16S rRNA sequences on ICU admission day. \*\*\*  $p < 0.0001$ , Mann–Whitney test.

### Contribution of clinical factors to data's effect size

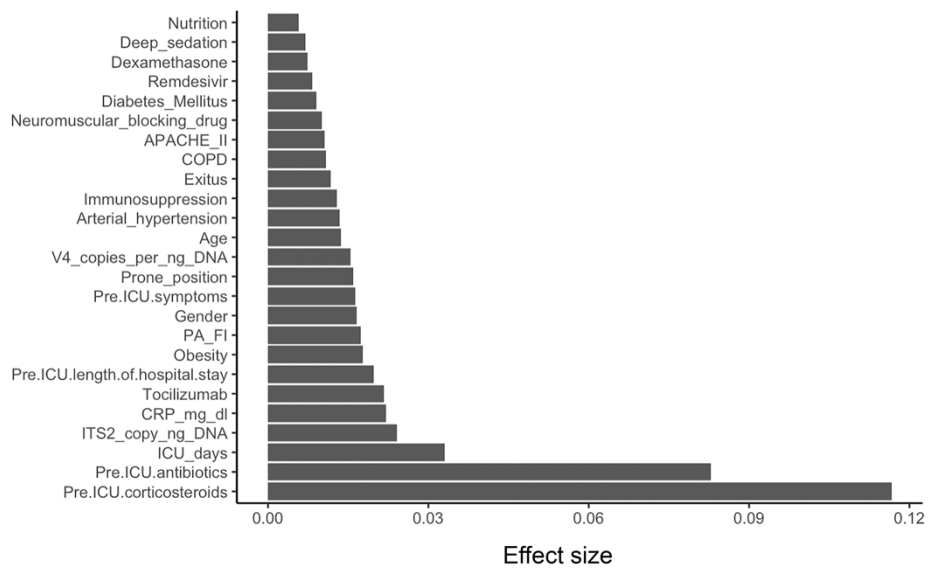

|                                 | Df | SumOfSqs | R2    | F     | Pr(>F) | FDR   |
|---------------------------------|----|----------|-------|-------|--------|-------|
| Pre.ICU.corticosteroids         | 8  | 2.088    | 0.117 | 1.204 | 0.106  | 0.372 |
| Pre.ICU.antibiotics             | 7  | 1.483    | 0.083 | 0.978 | 0.536  | 0.807 |
| ICU_days                        | 1  | 0.592    | 0.033 | 2.730 | 0.003  | 0.075 |
| ITS2_copy_ng_DNA                | 1  | 0.433    | 0.024 | 1.996 | 0.025  | 0.258 |
| CRP_mg_dl                       | 1  | 0.395    | 0.022 | 1.824 | 0.050  | 0.295 |
| Tocilizumab                     | 1  | 0.387    | 0.022 | 1.788 | 0.031  | 0.258 |
| Pre.ICU.length.of.hospital.stay | 1  | 0.354    | 0.020 | 1.634 | 0.059  | 0.295 |
| Obesity                         | 1  | 0.316    | 0.018 | 1.460 | 0.113  | 0.372 |
| PA_FI                           | 1  | 0.311    | 0.017 | 1.433 | 0.119  | 0.372 |
| Gender                          | 1  | 0.297    | 0.017 | 1.370 | 0.142  | 0.394 |
| Pre.ICU.symptoms                | 1  | 0.293    | 0.016 | 1.350 | 0.176  | 0.440 |
| Prone_position                  | 2  | 0.285    | 0.016 | 0.657 | 0.925  | 0.963 |
| V4_copies_per_ng_DNA            | 1  | 0.276    | 0.015 | 1.272 | 0.211  | 0.480 |
| Age                             | 1  | 0.245    | 0.014 | 1.131 | 0.289  | 0.577 |
| Arterial_hypertension           | 1  | 0.241    | 0.013 | 1.110 | 0.300  | 0.577 |
| Immunosuppression               | 1  | 0.230    | 0.013 | 1.060 | 0.364  | 0.650 |
| Exitus                          | 1  | 0.210    | 0.012 | 0.968 | 0.450  | 0.750 |
| COPD                            | 1  | 0.193    | 0.011 | 0.893 | 0.561  | 0.807 |
| APACHE_II                       | 1  | 0.190    | 0.011 | 0.876 | 0.581  | 0.807 |
| Neuromuscular_blocking_drug     | 1  | 0.181    | 0.010 | 0.835 | 0.620  | 0.816 |
| Diabetes_Mellitus               | 1  | 0.161    | 0.009 | 0.744 | 0.745  | 0.931 |
| Remdesivir                      | 1  | 0.148    | 0.008 | 0.684 | 0.803  | 0.956 |
| Dexamethasone                   | 1  | 0.132    | 0.007 | 0.611 | 0.902  | 0.963 |
| Deep_sedation                   | 1  | 0.125    | 0.007 | 0.579 | 0.914  | 0.963 |
| Nutrition                       | 1  | 0.103    | 0.006 | 0.474 | 0.963  | 0.963 |
| Residual                        | 38 | 8.234    | 0.460 | NA    | NA     | NA    |
| Total                           | 77 | 17.902   | 1.000 | NA    | NA     | NA    |

**Supplementary Figure S2.** Analysis of covariates with potential effect on microbiome variation in samples collected at baseline from ICU-COV(-) and ICU-COV(+) patients using the adonis test.

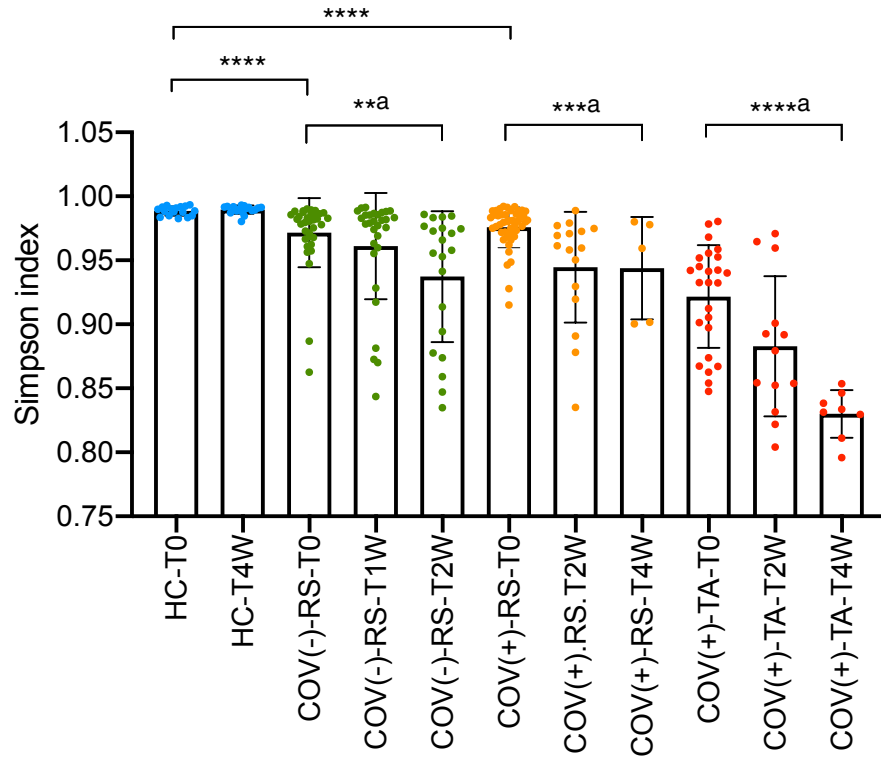

**Supplementary Figure S3.** Bacterial evenness as assessed by the Simpson index analysis of the 16S rRNA sequences. \*\*  $P < 0.001$ ; \*\*\*  $P < 0.0001$ ; \*\*\*\*  $P < 0.00001$ , Mann-Whitney test unless 3 groups were tested then Kruskal-Wallis test was applied (a).



microbiome of ICU-COV(+) patients. Only taxa found significantly different between groups were plotted ( $FDR < 0.05$ ). MaAsLin2 tool was used for comparison analysis.
