# Supplementary material for: Dysbiosis: An Indicator of COVID-19 Severity in Critically Ill Patients
Source: MDPI journal article supplement (doi:10.3390/ijms232415808), 2022-12-13
Supplement: s1 [file s1]

Supplementary Table S3. HC versus ICU-COV(-) (MaAsLin2 test)

| feature                                                                                                            | metadata                       | value      | coef      | stderr | N  | N.not0 | pval      | qval      |
|--------------------------------------------------------------------------------------------------------------------|--------------------------------|------------|-----------|--------|----|--------|-----------|-----------|
| 1 k_Bacteria.p_Firmicutes.c_Clostridia.o_Clostridiales.f_Ruminococcaceae.g_Oscillospira_                           | SampleStatus_typeICU.Patient_R | -4.5106973 | 0.4895552 | 49     | 28 | 4      | 2.0E-12   | 1.05E-10  |
| 2 k_Bacteria.p_Firmicutes.c_Clostridia.o_Clostridiales.f_Lachnospiraceae.g_Lachnospira_                            | SampleStatus_typeICU.Patient_R | -4.3953994 | 0.579291  | 49     | 30 | 1      | 0.6E-09   | 2.03E-08  |
| 3 k_Bacteria.p_Firmicutes.c_Clostridia.o_Clostridiales.f_Ruminococcaceae.g_Faecalibacterium_                       | SampleStatus_typeICU.Patient_R | -4.1830705 | 0.9830144 | 49     | 29 | 9      | 8.8E-05   | 0.000437  |
| 4 k_Bacteria.p_Firmicutes.c_Clostridia.o_Clostridiales.f_Christensenellaceae_                                      | SampleStatus_typeICU.Patient_R | -4.0292137 | 0.8126631 | 49     | 33 | 9      | 6.9E-06   | 5.57E-05  |
| 5 k_Bacteria.p_Firmicutes.c_Clostridia.o_Clostridiales.f_Lachnospiraceae.g_Lachnospira_                            | SampleStatus_typeICU.Patient_R | -3.9242846 | 0.7325831 | 49     | 17 | 2      | 4.9E-06   | 1.59E-05  |
| 6 k_Bacteria.p_Tenericutes.c_Mollicutes.o_RF39_                                                                    | SampleStatus_typeICU.Patient_R | -3.5715735 | 0.5766499 | 49     | 17 | 1      | 1.37E-07  | 1.58E-06  |
| 7 k_Bacteria.p_Firmicutes.c_Clostridia.o_Clostridiales.f_Ruminococcaceae.g_Ruminococcus_                           | SampleStatus_typeICU.Patient_R | -3.2905102 | 0.7255781 | 49     | 36 | 3      | 9.7E-05   | 0.0002077 |
| 8 k_Bacteria.p_Firmicutes.c_Clostridia.o_Clostridiales_                                                            | SampleStatus_typeICU.Patient_R | -3.2155575 | 0.5706771 | 49     | 48 | 9      | 9.57E-07  | 7.88E-06  |
| 9 k_Bacteria.p_Firmicutes.c_Clostridia.o_Clostridiales.f_Clostridiaceae.g_Clostridium_                             | SampleStatus_typeICU.Patient_R | -3.1527298 | 0.6151162 | 49     | 31 | 5      | 5.0E-06   | 3.33E-05  |
| 10 k_Bacteria.p_Firmicutes.c_Clostridia.o_Clostridiales.f_Lachnospiraceae.g_Anaerostipes_                          | SampleStatus_typeICU.Patient_R | -2.9516189 | 0.5459242 | 49     | 19 | 2      | 1.0E-06   | 1.42E-05  |
| 11 k_Bacteria.p_Firmicutes.c_Clostridia.o_Clostridiales.f_Ruminococcaceae_                                         | SampleStatus_typeICU.Patient_R | -2.9324429 | 0.6510859 | 49     | 44 | 4      | 4.40E-05  | 0.0002134 |
| 12 k_Bacteria.p_Bacteroidetes.c_Bacteroidia.o_Bacteroidales.f_Bacteroidaceae.g_Bacteroides.s_ovatus_               | SampleStatus_typeICU.Patient_R | -2.8833244 | 1.0112398 | 49     | 18 | 0      | 0.0064495 | 0.0151366 |
| 13 k_Bacteria.p_Firmicutes.c_Clostridia.o_Clostridiales.f_Lachnospiraceae_                                         | SampleStatus_typeICU.Patient_R | -2.8376747 | 0.7192695 | 49     | 46 | 0      | 0.0002646 | 0.0011077 |
| 14 k_Bacteria.p_Firmicutes.c_Clostridia.o_Clostridiales.f_Lachnospiraceae.g_Blautia_                               | SampleStatus_typeICU.Patient_R | -2.8130215 | 0.6250702 | 49     | 37 | 4      | 4.5E-05   | 0.0002134 |
| 15 k_Bacteria.p_Firmicutes.c_Clostridia.o_Clostridiales.f_Lachnospiraceae.g_Ruminococcus_                          | SampleStatus_typeICU.Patient_R | -2.7749399 | 0.8307578 | 49     | 21 | 0      | 0.016464  | 0.0048548 |
| 16 k_Bacteria.p_Firmicutes.c_Clostridia.o_Clostridiales.f_Ruminococcaceae.g_Ruminococcus_                          | SampleStatus_typeICU.Patient_R | -2.7712557 | 0.6486913 | 49     | 41 | 9      | 9.3E-05   | 0.0004306 |
| 17 k_Bacteria.p_Firmicutes.c_Clostridia.o_Clostridiales.f_Ruminococcaceae_                                         | SampleStatus_typeICU.Patient_R | -2.7549925 | 0.5889155 | 49     | 48 | 2      | 4.8E-05   | 0.0001356 |
| 18 k_Bacteria.p_Firmicutes.c_Clostridia.o_Clostridiales.f_Veillonellaceae.g_Phascolartobacterium_                  | SampleStatus_typeICU.Patient_R | -2.6315089 | 0.6857596 | 49     | 10 | 0      | 0.0003701 | 0.0014188 |
| 19 k_Bacteria.p_Bacteroidetes.c_Bacteroidia.o_Bacteroidales.f_Barnesiellaceae_                                     | SampleStatus_typeICU.Patient_R | -2.6193279 | 0.7592956 | 49     | 31 | 0      | 0.0011952 | 0.0038181 |
| 20 k_Bacteria.p_Firmicutes.c_Clostridia.o_Clostridiales.f_Lachnospiraceae_                                         | SampleStatus_typeICU.Patient_R | -2.6081001 | 0.682858  | 49     | 46 | 0      | 0.0003913 | 0.0014515 |
| 21 k_Bacteria.p_Firmicutes.c_Erysipelotrichi.o_Erysipelotrichales.f_Erysipelotrichaceae_                           | SampleStatus_typeICU.Patient_R | -2.5409869 | 0.785588  | 49     | 37 | 0      | 0.002327  | 0.0064191 |
| 22 k_Bacteria.p_Firmicutes.c_Clostridia.o_Clostridiales.f_Clostridiaceae_                                          | SampleStatus_typeICU.Patient_R | -2.4372577 | 0.728614  | 49     | 34 | 0      | 0.016236  | 0.0048548 |
| 23 k_Bacteria.p_Bacteroidetes.c_Bacteroidia.o_Bacteroidales.f_Rikenellaceae_                                       | SampleStatus_typeICU.Patient_R | -2.3171583 | 0.5889819 | 49     | 45 | 0      | 0.0002739 | 0.0011077 |
| 24 k_Bacteria.p_Firmicutes.c_Clostridia.o_Clostridiales_                                                           | SampleStatus_typeICU.Patient_R | -2.0951886 | 0.7114452 | 49     | 28 | 0      | 0.0050089 | 0.0122559 |
| 25 k_Bacteria.p_Bacteroidetes.c_Bacteroidia.o_Bacteroidales.f_Odoribacteraceae.g_Odoribacter_                      | SampleStatus_typeICU.Patient_R | -2.0934061 | 0.7738788 | 49     | 38 | 0      | 0.0094819 | 0.0201929 |
| 26 k_Bacteria.p_Bacteroidetes.c_Bacteroidia.o_Bacteroidales.f_Paraprevotellaceae.g_Paraprevotella_                 | SampleStatus_typeICU.Patient_R | -2.0025376 | 0.8429489 | 49     | 20 | 0      | 0.0216483 | 0.0388992 |
| 27 k_Archaea.p_Euryarchaeota.c_Methanobacteria.o_Methanobacteriales.f_Methanobacteriaceae.g_Methanobrevibacter_    | SampleStatus_typeICU.Patient_R | -1.9804114 | 0.6480702 | 49     | 24 | 0      | 0.036391  | 0.0096523 |
| 28 k_Bacteria.p_Firmicutes.c_Clostridia.o_Clostridiales.f_Ruminococcaceae.g_Oscillospira_                          | SampleStatus_typeICU.Patient_R | -1.9282466 | 0.6637918 | 49     | 39 | 0      | 0.0055839 | 0.0133781 |
| 29 k_Bacteria.p_Firmicutes.c_Clostridia.o_Clostridiales.f_Lachnospiraceae.g_Dorea_                                 | SampleStatus_typeICU.Patient_R | -1.8898437 | 0.7184729 | 49     | 33 | 0      | 0.0114954 | 0.0236067 |
| 30 k_Bacteria.p_Firmicutes.c_Clostridia.o_Clostridiales.f_Lachnospiraceae.g_Blautia_                               | SampleStatus_typeICU.Patient_R | -1.5456324 | 0.5091967 | 49     | 42 | 0      | 0.0039081 | 0.0097702 |
| 31 k_Bacteria.p_Tenericutes.c_RF3.o_ML615J28_                                                                      | SampleStatus_typeICU.Patient_R | -1.3252884 | 0.4695425 | 49     | 9  | 0      | 0.0069638 | 0.0160166 |
| 32 k_Bacteria.p_Lentisphaerae.c_Lentisphaera.o_Victivallales.f_Victivallaceae_                                     | SampleStatus_typeICU.Patient_R | -1.2541478 | 0.461163  | 49     | 14 | 0      | 0.0091321 | 0.0198149 |
| 33 k_Bacteria.p_Firmicutes.c_Clostridia.o_Clostridiales.f_Lachnospiraceae.g_Lachnobacterium_                       | SampleStatus_typeICU.Patient_R | -0.823584  | 0.2881031 | 49     | 10 | 0      | 0.0035321 | 0.0096523 |
| 34 k_Bacteria.p_Firmicutes.c_Clostridia.o_Clostridiales.f_Clostridiaceae_                                          | SampleStatus_typeICU.Patient_R | -0.8152845 | 0.3222463 | 49     | 11 | 0      | 0.0148165 | 0.0283982 |
| 35 k_Bacteria.p_Firmicutes.c_Clostridia.o_Clostridiales.f_Lachnospiraceae.g_Roseburia_                             | SampleStatus_typeICU.Patient_R | -0.6588066 | 0.2549733 | 49     | 9  | 0      | 0.0129401 | 0.0252222 |
| 1 k_Bacteria.p_Firmicutes.c_Clostridia.o_Clostridiales.f_Tissierellaceae.g_Gallicola_                              | SampleStatus_typeICU.Patient_R | 0.6974099  | 0.2665434 | 49     | 11 | 0      | 0.0119096 | 0.0237737 |
| 2 k_Bacteria.p_Firmicutes.c_Clostridia.o_Clostridiales.f_Veillonellaceae.g_Succinoclasticum_                       | SampleStatus_typeICU.Patient_R | 0.9897599  | 0.4231458 | 49     | 9  | 0      | 0.0236352 | 0.0418162 |
| 3 k_Bacteria.p_Bacteroidetes.c_Bacteroidia.o_Bacteroidales_                                                        | SampleStatus_typeICU.Patient_R | 1.26590981 | 0.4843086 | 49     | 11 | 0      | 0.0119092 | 0.0237737 |
| 4 k_Bacteria.p_Synergistetes.c_Synergistia.o_Synergistales.f_Dethiosulfovibrionaceae_                              | SampleStatus_typeICU.Patient_R | 1.2691248  | 0.4730156 | 49     | 11 | 0      | 0.010309  | 0.0209906 |
| 5 k_Bacteria.p_Firmicutes.c_Clostridia.o_Clostridiales.f_Peptostreptococcaceae.g_Peptostreptococcus.s_anaerobius_  | SampleStatus_typeICU.Patient_R | 1.28960411 | 0.4685914 | 49     | 11 | 0      | 0.0083872 | 0.0185486 |
| 6 k_Bacteria.p_Bacteroidetes.c_Bacteroidia.o_Bacteroidales.f_Paraprevotellaceae.g_Prevotella_                      | SampleStatus_typeICU.Patient_R | 1.38138067 | 0.6025812 | 49     | 9  | 0      | 0.0264029 | 0.0453184 |
| 7 k_Bacteria.p_Firmicutes.c_Bacilli.o_Bacillales.f_Staphylococcaceae.g_Staphylococcus_                             | SampleStatus_typeICU.Patient_R | 1.48770892 | 0.5911557 | 49     | 12 | 0      | 0.0153611 | 0.0289594 |
| 8 k_Bacteria.p_Actinobacteria.c_Actinobacteria.o_Actinomycetales.f_Actinomycetaceae.g_Arcanobacterium_             | SampleStatus_typeICU.Patient_R | 1.48838408 | 0.6046747 | 49     | 10 | 0      | 0.0175631 | 0.0325768 |
| 9 k_Bacteria.p_Firmicutes.c_Clostridia.o_Clostridiales.f_Tissierellaceae.g_ph2_                                    | SampleStatus_typeICU.Patient_R | 1.49138546 | 0.6169605 | 49     | 10 | 0      | 0.0195684 | 0.0357201 |
| 10 k_Bacteria.p_Firmicutes.c_Clostridia.o_Clostridiales.f_Veillonellaceae.g_Megasphaera_                           | SampleStatus_typeICU.Patient_R | 1.57658422 | 0.5081128 | 49     | 14 | 0      | 0.0032401 | 0.0096088 |
| 11 k_Bacteria.p_Firmicutes.c_Erysipelotrichi.o_Erysipelotrichales.f_Erysipelotrichaceae.g_Eubacterium.s_dolichum_  | SampleStatus_typeICU.Patient_R | 1.83550482 | 0.7883819 | 49     | 23 | 0      | 0.0242557 | 0.0422638 |
| 12 k_Bacteria.p_Firmicutes.c_Clostridia.o_Clostridiales.f_Clostridiaceae.g_Clostridium_                            | SampleStatus_typeICU.Patient_R | 2.07489518 | 0.7486779 | 49     | 12 | 0      | 0.0079719 | 0.0179759 |
| 13 k_Bacteria.p_Firmicutes.c_Clostridia.o_Clostridiales.f_Mogibacteriaceae.g_Mogibacterium_                        | SampleStatus_typeICU.Patient_R | 2.46597492 | 0.8122279 | 49     | 19 | 0      | 0.0039013 | 0.0097702 |
| 14 k_Bacteria.p_Bacteroidetes.c_Bacteroidia.o_Bacteroidales.f_S247_                                                | SampleStatus_typeICU.Patient_R | 2.58974542 | 0.846167  | 49     | 25 | 0      | 0.0036452 | 0.0096523 |
| 15 k_Bacteria.p_Firmicutes.c_Clostridia.o_Clostridiales.f_Peptococcaceae.g_Peptococcus_                            | SampleStatus_typeICU.Patient_R | 2.6681403  | 0.7223718 | 49     | 16 | 0      | 0.0005754 | 0.0020052 |
| 16 k_Bacteria.p_Proteobacteria.c_Gammaproteobacteria.o_Enterobacteriales.f_Enterobacteriaceae_                     | SampleStatus_typeICU.Patient_R | 2.77404245 | 0.7384631 | 49     | 32 | 0      | 0.0004748 | 0.0017063 |
| 17 k_Bacteria.p_Firmicutes.c_Clostridia.o_Clostridiales.f_Tissierellaceae.g_ph2_                                   | SampleStatus_typeICU.Patient_R | 2.80361347 | 0.7955238 | 49     | 15 | 0      | 0.0009582 | 0.0031485 |
| 18 k_Bacteria.p_Actinobacteria.c_Actinobacteria.o_Actinomycetales.f_Actinomycetaceae.g_Actinomycetes_              | SampleStatus_typeICU.Patient_R | 2.91635751 | 0.8590208 | 49     | 24 | 0      | 0.0014036 | 0.0043626 |
| 19 k_Bacteria.p_Actinobacteria.c_Actinobacteria.o_Actinomycetales.f_Actinomycetaceae_                              | SampleStatus_typeICU.Patient_R | 3.14785265 | 0.8014119 | 49     | 18 | 0      | 0.0002793 | 0.0011077 |
| 20 k_Bacteria.p_Fusobacteria.c_Fusobacteria.o_Fusobacteriales.f_Fusobacteriaceae.g_Fusobacterium_                  | SampleStatus_typeICU.Patient_R | 3.27161556 | 0.9228814 | 49     | 18 | 0      | 0.0008976 | 0.0030359 |
| 21 k_Bacteria.p_Actinobacteria.c_Actinobacteria.o_Actinomycetales.f_Actinomycetaceae.g_Varibaculum_                | SampleStatus_typeICU.Patient_R | 4.07414088 | 0.5769823 | 49     | 27 | 6      | 6.0E-09   | 1.08E-07  |
| 22 k_Bacteria.p_Firmicutes.c_Clostridia.o_Clostridiales.f_Veillonellaceae.g_Dialister_                             | SampleStatus_typeICU.Patient_R | 4.13626791 | 0.7304154 | 49     | 38 | 8      | 8.8E-07   | 7.68E-06  |
| 23 k_Bacteria.p_Actinobacteria.c_Actinobacteria.o_Actinomycetales.f_Corynebacteriaceae.g_Corynebacterium_          | SampleStatus_typeICU.Patient_R | 4.40681596 | 0.6594121 | 49     | 28 | 2      | 4.8E-08   | 3.56E-07  |
| 24 k_Bacteria.p_Proteobacteria.c_Epsilonproteobacteria.o_Campylobacteriales.f_Campylobacteriaceae.g_Campylobacter_ | SampleStatus_typeICU.Patient_R | 4.43107834 | 0.7241094 | 49     | 24 | 1      | 7.8E-07   | 1.86E-06  |
| 25 k_Bacteria.p_Bacteroidetes.c_Bacteroidia.o_Bacteroidales.f_Prevotellaceae.g_Prevotella_                         | SampleStatus_typeICU.Patient_R | 4.54899126 | 0.7917309 | 49     | 44 | 6      | 6.5E-07   | 6.25E-06  |
| 26 k_Bacteria.p_Firmicutes.c_Clostridia.o_Clostridiales.f_Tissierellaceae.g_Anaerococcus_                          | SampleStatus_typeICU.Patient_R | 4.78284662 | 0.5205008 | 49     | 30 | 4      | 5.6E-12   | 1.05E-10  |
| 27 k_Bacteria.p_Firmicutes.c_Clostridia.o_Clostridiales.f_Tissierellaceae_                                         | SampleStatus_typeICU.Patient_R | 4.8849652  | 0.894348  | 49     | 22 | 1      | 7.4E-06   | 1.25E-05  |
| 28 k_Bacteria.p_Firmicutes.c_Clostridia.o_Clostridiales.f_Tissierellaceae.g_Finegoldia_                            | SampleStatus_typeICU.Patient_R | 4.92503466 | 0.4343523 | 49     | 31 | 4      | 4.7E-15   | 5.48E-13  |
| 29 k_Bacteria.p_Bacteroidetes.c_Bacteroidia.o_Bacteroidales.f_Porphyrimonadaceae.g_Porphyrimonas.s_endodontalis    | SampleStatus_typeICU.Patient_R | 5.00974622 | 0.9097838 | 49     | 23 | 1      | 4.9E-06   | 1.14E-05  |
| 30 k_Bacteria.p_Firmicutes.c_Clostridia.o_Clostridiales.f_Tissierellaceae.g_Peptoniphilus_                         | SampleStatus_typeICU.Patient_R | 5.78826027 | 0.5510934 | 49     | 31 | 6      | 6.4E-14   | 3.69E-12  |
| 31 k_Bacteria.p_Firmicutes.c_Clostridia.o_Clostridiales.f_Tissierellaceae.g_WAL_1855D_                             | SampleStatus_typeICU.Patient_R | 5.99769423 | 0.95136   | 49     | 25 | 9      | 9.31E-08  | 1.19E-06  |
| 32 k_Bacteria.p_Bacteroidetes.c_Bacteroidia.o_Bacteroidales.f_Porphyrimonadaceae.g_Porphyrimonas_                  | SampleStatus_typeICU.Patient_R | 6.59759703 | 0.6879694 | 49     | 30 | 1      | 1.22E-12  | 4.66E-11  |
