# Supplementary material for: Dysbiosis: An Indicator of COVID-19 Severity in Critically Ill Patients
Source: MDPI journal article supplement (doi:10.3390/ijms232415808), 2022-12-13
Supplement: s1 [file s1]

Supplementary Table S1. Antibiotics intake

| #Sample         |            | T0W                                                | T1W                                                | T2W                                                |
|-----------------|------------|----------------------------------------------------|----------------------------------------------------|----------------------------------------------------|
| ICU.RS.1        | ICU-COV(-) | Beta-lactam                                        | Beta-lactam                                        | Beta-lactam                                        |
| ICU.RS.2        | ICU-COV(-) | Beta-lactam                                        | Beta-lactam                                        | Quinolone                                          |
| ICU.RS.3        | ICU-COV(-) | Beta-lactam + quinolone                            | Beta-lactam                                        | Beta-lactam                                        |
| ICU.RS.4        | ICU-COV(-) | Beta-lactam                                        | Beta-lactam                                        | Beta-lactam                                        |
| ICU.RS.5        | ICU-COV(-) | Beta-lactam                                        | Beta-lactam                                        | Beta-lactam                                        |
| ICU.RS.6        | ICU-COV(-) | Beta-lactam                                        | Beta-lactam                                        |                                                    |
| ICU.RS.7        | ICU-COV(-) | Beta-lactam                                        | 0                                                  |                                                    |
| ICU.RS.8        | ICU-COV(-) | Beta-lactam                                        | Beta-lactam                                        |                                                    |
| ICU.RS.9        | ICU-COV(-) | Beta-lactam                                        | Quinolone                                          | Quinolone                                          |
| ICU.RS.10       | ICU-COV(-) | Beta-lactam                                        | Beta-lactam                                        | 0                                                  |
| ICU.RS.11       | ICU-COV(-) | Beta-lactam                                        | 0                                                  |                                                    |
| ICU.RS.12       | ICU-COV(-) | Beta-lactam + macrolide                            | Beta-lactam                                        |                                                    |
| ICU.RS.13       | ICU-COV(-) | Beta-lactam                                        | Beta-lactam + quinolone                            |                                                    |
| ICU.RS.14       | ICU-COV(-) | Beta-lactam                                        | Beta-lactam + vancomycin + teicoplanin + linezolid | Beta-lactam + vancomycin + teicoplanin + linezolid |
| ICU.RS.16       | ICU-COV(-) | Beta-lactam                                        | Beta-lactam                                        | Quinolone                                          |
| ICU.RS.18       | ICU-COV(-) | Beta-lactam                                        | Beta-lactam                                        |                                                    |
| ICU.RS.19       | ICU-COV(-) | Beta-lactam                                        | Beta-lactam                                        | Beta-lactam                                        |
| ICU.RS.20       | ICU-COV(-) | Beta-lactam                                        | Quinolone                                          | Quinolone                                          |
| ICU.RS.22       | ICU-COV(-) | Beta-lactam + quinolone                            | Beta-lactam + quinolone                            | Beta-lactam + quinolone                            |
| ICU.RS.23       | ICU-COV(-) | Beta-lactam                                        | Beta-lactam                                        | Beta-lactam + quinolone                            |
| ICU.RS.24       | ICU-COV(-) | Beta-lactam                                        | Beta-lactam + vancomycin + teicoplanin + linezolid | Quinolone                                          |
| ICU.RS.25       | ICU-COV(-) | Beta-lactam                                        | Beta-lactam                                        | Beta-lactam                                        |
| ICU.RS.26       | ICU-COV(-) | Beta-lactam + vancomycin + teicoplanin + linezolid | Beta-lactam + vancomycin + teicoplanin + linezolid | Quinolone                                          |
| ICU.RS.27       | ICU-COV(-) | Beta-lactam + quinolone                            | Quinolone                                          |                                                    |
| ICU.RS.28       | ICU-COV(-) | Beta-lactam + oseltamivir                          | Beta-lactam + quinolone                            | Beta-lactam + aminoglycoside                       |
| ICU.RS.29       | ICU-COV(-) | Beta-lactam + anti-Tuberculosis                    | Beta-lactam + anti-Tuberculosis                    |                                                    |
| ICU.RS.30       | ICU-COV(-) | Beta-lactam                                        | Quinolone                                          | Quinolone                                          |
| ICU.RS.31       | ICU-COV(-) | Beta-lactam                                        | Beta-lactam                                        |                                                    |
| ICU.RS.32       | ICU-COV(-) | 0                                                  | Beta-lactam + quinolone                            | Beta-lactam + quinolone                            |
| ICU.RS.33       | ICU-COV(-) | Beta-lactam + quinolone                            | Beta-lactam + quinolone                            | Beta-lactam + vancomycin + teicoplanin + linezolid |
| ICU.RS.44       | ICU-COV(-) | Others                                             |                                                    |                                                    |
| ICU.RS.50       | ICU-COV(-) | 0                                                  |                                                    |                                                    |
|                 |            | T0W                                                | T2W                                                | T4W                                                |
| COVID.ICU.RS.1  | ICU-COV(+) | Others                                             |                                                    |                                                    |
| COVID.ICU.RS.2  | ICU-COV(+) | Others                                             | 0                                                  |                                                    |
| COVID.ICU.RS.3  | ICU-COV(+) | Beta-lactam + macrolide                            | Beta-lactam + anti-fungi                           | Galactopeptide                                     |
| COVID.ICU.RS.4  | ICU-COV(+) | Beta-lactam + macrolide                            | Beta-lactam + quinolone                            |                                                    |
| COVID.ICU.RS.5  | ICU-COV(+) | Others                                             |                                                    |                                                    |
| COVID.ICU.RS.6  | ICU-COV(+) | Beta-lactam                                        | 0                                                  |                                                    |
| COVID.ICU.RS.7  | ICU-COV(+) | Beta-lactam + macrolide                            | Beta-lactam + macrolide + quinolone                |                                                    |
| COVID.ICU.RS.8  | ICU-COV(+) | Beta-lactam + macrolide                            |                                                    |                                                    |
| COVID.ICU.RS.9  | ICU-COV(+) | Beta-lactam + macrolide                            |                                                    |                                                    |
| COVID.ICU.RS.10 | ICU-COV(+) | Beta-lactam + macrolide                            | 0                                                  |                                                    |
| COVID.ICU.RS.11 | ICU-COV(+) | Beta-lactam + macrolide                            |                                                    |                                                    |
| COVID.ICU.RS.12 | ICU-COV(+) | Beta-lactam + macrolide                            | Beta-lactam + quinolone                            | 0                                                  |
| COVID.ICU.RS.14 | ICU-COV(+) | Beta-lactam + macrolide                            |                                                    |                                                    |
| COVID.ICU.RS.16 | ICU-COV(+) | Others                                             |                                                    |                                                    |
| COVID.ICU.RS.18 | ICU-COV(+) | Beta-lactam + macrolide                            |                                                    |                                                    |
| COVID.ICU.RS.19 | ICU-COV(+) | Beta-lactam + macrolide                            | Beta-lactam                                        |                                                    |
| COVID.ICU.RS.20 | ICU-COV(+) | Beta-lactam + macrolide                            |                                                    |                                                    |
| COVID.ICU.RS.21 | ICU-COV(+) | Others                                             |                                                    |                                                    |
| COVID.ICU.RS.22 | ICU-COV(+) | Beta-lactam + macrolide                            | Beta-lactam                                        |                                                    |
| COVID.ICU.RS.23 | ICU-COV(+) | Beta-lactam + macrolide                            | Beta-lactam                                        |                                                    |
| COVID.ICU.RS.24 | ICU-COV(+) | Others                                             |                                                    |                                                    |
| COVID.ICU.RS.25 | ICU-COV(+) | Beta-lactam + macrolide                            |                                                    |                                                    |
| COVID.ICU.RS.26 | ICU-COV(+) | Beta-lactam + macrolide                            |                                                    |                                                    |
| COVID.ICU.RS.27 | ICU-COV(+) | Beta-lactam + macrolide                            |                                                    |                                                    |
| COVID.ICU.RS.28 | ICU-COV(+) | Others                                             | 0                                                  |                                                    |
| COVID.ICU.RS.29 | ICU-COV(+) | Beta-lactam + macrolide                            |                                                    |                                                    |
| COVID.ICU.RS.30 | ICU-COV(+) | Beta-lactam + macrolide                            |                                                    | Beta-lactam                                        |
| COVID.ICU.RS.31 | ICU-COV(+) | Beta-lactam + macrolide                            |                                                    |                                                    |
| COVID.ICU.RS.32 | ICU-COV(+) | Beta-lactam + macrolide                            |                                                    |                                                    |
| COVID.ICU.RS.33 | ICU-COV(+) | Beta-lactam + macrolide                            |                                                    |                                                    |
| COVID.ICU.RS.34 | ICU-COV(+) |                                                    | Beta-lactam + anti-fungi                           |                                                    |
| COVID.ICU.RS.35 | ICU-COV(+) | Beta-lactam + macrolide                            |                                                    |                                                    |
| COVID.ICU.RS.36 | ICU-COV(+) | Beta-lactam + macrolide                            |                                                    |                                                    |
| COVID.ICU.RS.37 | ICU-COV(+) | Beta-lactam + macrolide                            |                                                    |                                                    |
| COVID.ICU.RS.38 | ICU-COV(+) | Beta-lactam + macrolide                            |                                                    |                                                    |
| COVID.ICU.RS.39 | ICU-COV(+) | Beta-lactam + macrolide                            | Beta-lactam                                        |                                                    |
| COVID.ICU.RS.40 | ICU-COV(+) | Beta-lactam + macrolide                            |                                                    |                                                    |
| COVID.ICU.RS.41 | ICU-COV(+) | Beta-lactam + macrolide                            |                                                    | Beta-lactam                                        |
| COVID.ICU.RS.42 | ICU-COV(+) |                                                    | Beta-lactam + quinolone                            |                                                    |
| COVID.ICU.RS.45 | ICU-COV(+) | Beta-lactam + macrolide                            |                                                    | Beta-lactam                                        |
| COVID.ICU.RS.47 | ICU-COV(+) | Beta-lactam + macrolide                            |                                                    |                                                    |
| COVID.ICU.RS.49 | ICU-COV(+) | Beta-lactam + macrolide                            |                                                    |                                                    |
| COVID.ICU.RS.51 | ICU-COV(+) | Beta-lactam + macrolide                            |                                                    |                                                    |
| COVID.ICU.RS.52 | ICU-COV(+) | Beta-lactam + macrolide                            | 0                                                  |                                                    |
| COVID.ICU.RS.53 | ICU-COV(+) | Others                                             |                                                    |                                                    |
| COVID.ICU.RS.54 | ICU-COV(+) | Beta-lactam + macrolide                            |                                                    |                                                    |
| COVID.ICU.RS.55 | ICU-COV(+) | Beta-lactam + macrolide                            |                                                    |                                                    |
| COVID.ICU.RS.56 | ICU-COV(+) | Beta-lactam + macrolide                            | 0                                                  |                                                    |
