# Supplementary material for: Dysbiosis: An Indicator of COVID-19 Severity in Critically Ill Patients
Source: MDPI journal article supplement (doi:10.3390/ijms232415808), 2022-12-13
Supplement: s1 [file s1]

Supplementary Table S7. ICU-COV(+) across time (Rectal swabs) (MaAsLin2 test)

| feature                                                                                                                     | metadata  | value    | coef       | stderr     | N  | N.not.0 | pval       | qval       |
|-----------------------------------------------------------------------------------------------------------------------------|-----------|----------|------------|------------|----|---------|------------|------------|
| k__Bacteria.p__Firmicutes.c__Bacilli.o__Lactobacillales.f__Enterococaceae.g__Enterococcus.---                               | TimePoint | Baseline | -4.0682916 | 0.81981409 | 67 | 37      | 5.44E-06   | 0.00011779 |
| k__Bacteria.p__Firmicutes.c__Clostridia.o__Clostridiales.f__Tissierellaceae.g__Finegoldia.---                               | TimePoint | 4 weeks  | -3.9855358 | 1.23756143 | 67 | 55      | 0.00201234 | 0.01937806 |
| k__Bacteria.p__Firmicutes.c__Clostridia.o__Clostridiales.f__Tissierellaceae.g__Anaerococcus.---                             | TimePoint | 4 weeks  | -3.6898698 | 1.30299564 | 67 | 54      | 0.00618001 | 0.04228431 |
| k__Bacteria.p__Bacteroidetes.c__Bacteroidia.o__Bacteroidales.f__Prevotellaceae.g__Prevotella.---                            | TimePoint | 4 weeks  | -3.0580385 | 1.06422779 | 67 | 61      | 0.00550303 | 0.03866996 |
| k__Bacteria.p__Firmicutes.c__Bacilli.o__Bacillales.f__Staphylococcaceae.g__Staphylococcus.---                               | TimePoint | Baseline | -2.698634  | 0.85682916 | 67 | 39      | 0.00248544 | 0.02154048 |
| k__Bacteria.p__Firmicutes.c__Erysipelotrichi.o__Erysipelotrichales.f__Erysipelotrichaceae.g__Eubacterium.s__dolichum.       | TimePoint | Baseline | -2.6769117 | 0.78995653 | 67 | 41      | 0.00120631 | 0.0130684  |
| k__Archaea.p__Euryarchaeota.c__Methanobacteria.o__Methanobacteriales.f__Methanobacteriaceae.g__Methanobrevibacter.---       | TimePoint | Baseline | -2.4102395 | 0.80485575 | 67 | 41      | 0.0039038  | 0.02985259 |
| k__Bacteria.p__Firmicutes.c__Clostridia.o__Clostridiales.f__Ruminococcaceae.g__Anaerotruncus.---                            | TimePoint | Baseline | -2.1440161 | 0.42110164 | 67 | 20      | 3.36E-06   | 9.70E-05   |
| k__Bacteria.p__Actinobacteria.c__Coriobacteria.o__Coriobacteriales.f__Coriobacteriaceae.g__Eggerthella.s__lenta.---         | TimePoint | Baseline | -1.9839949 | 0.65108851 | 67 | 32      | 0.00335442 | 0.02642873 |
| k__Bacteria.p__Firmicutes.c__Clostridia.o__Clostridiales.f__Eubacteriaceae.g__Pseudoramibacter_Eubacterium.---              | TimePoint | Baseline | -1.6161737 | 0.44795594 | 67 | 17      | 0.00060574 | 0.00715879 |
| k__Bacteria.p__Actinobacteria.c__Actinobacteria.o__Bifidobacteriales.f__Bifidobacteriaceae.g__Bifidobacterium.---           | TimePoint | Baseline | 1.1433934  | 0.41123967 | 67 | 16      | 0.00712271 | 0.04629761 |
| k__Bacteria.p__Actinobacteria.c__Coriobacteria.o__Coriobacteriales.f__Coriobacteriaceae.g__Slackia.---                      | TimePoint | Baseline | 1.26368497 | 0.4519016  | 67 | 18      | 0.00681616 | 0.04544107 |
| k__Bacteria.p__Firmicutes.c__Clostridia.o__Clostridiales.f__Peptococcaceae.g__Peptococcus.---                               | TimePoint | Baseline | 1.63471502 | 0.53361342 | 67 | 31      | 0.00319944 | 0.02617972 |
| k__Bacteria.p__Proteobacteria.c__Gammaproteobacteria.o__Pasteurellales.f__Pasteurellaceae.g__Haemophilus.s__parainfluenzae. | TimePoint | Baseline | 2.01374957 | 0.62875358 | 67 | 22      | 0.00212185 | 0.01970293 |
| k__Bacteria.p__Actinobacteria.c__Actinobacteria.o__Actinomycetales.f__Actinomycetaceae.g__Arcanobacterium.---               | TimePoint | Baseline | 2.08618801 | 0.70052673 | 67 | 18      | 0.00409389 | 0.03041174 |
| k__Bacteria.p__Actinobacteria.c__Deltaproteobacteria.o__Desulfovibrionales.f__Desulfovibrionaceae.g__Bilophila.---          | TimePoint | Baseline | 2.18579979 | 0.56256599 | 67 | 46      | 0.00024493 | 0.00335165 |
| k__Bacteria.p__Bacteroidetes.c__Bacteroidia.o__Bacteroidales.f__Porphyromonadaceae.g__Porphyromonas.s__endodontalis.---     | TimePoint | Baseline | 2.21424245 | 0.55269325 | 67 | 26      | 0.0016332  | 0.00235912 |
| k__Bacteria.p__Firmicutes.c__Clostridia.o__Clostridiales.f__Ruminococcaceae.g__Faecalibacterium.s__prausnitzii.             | TimePoint | Baseline | 2.31573234 | 0.70958951 | 67 | 42      | 0.0017681  | 0.01768095 |
| k__Bacteria.p__Firmicutes.c__Clostridia.o__Clostridiales.f__Lachnospiraceae.g__Lachnospira.---                              | TimePoint | Baseline | 2.44730545 | 0.77339321 | 67 | 23      | 0.00237873 | 0.02132656 |
| k__Bacteria.p__Bacteroidetes.c__Bacteroidia.o__Bacteroidales.f__Prevotellaceae.g__Prevotella.s__copri.                      | TimePoint | Baseline | 2.46204793 | 0.80431405 | 67 | 21      | 0.00322212 | 0.02617972 |
| k__Bacteria.p__Firmicutes.c__Bacilli.o__Lactobacillales.f__Streptococcaceae.g__Streptococcus.---                            | TimePoint | Baseline | 2.54049193 | 0.87769216 | 67 | 43      | 0.0051878  | 0.03746743 |
| k__Bacteria.p__Proteobacteria.c__Betaproteobacteria.o__Burkholderiales.f__Alcaligenaceae.g__Sutterella.---                  | TimePoint | Baseline | 2.5667404  | 0.66895992 | 67 | 45      | 0.00028765 | 0.00373951 |
| k__Bacteria.p__Firmicutes.c__Clostridia.o__Clostridiales.f__Tissierellaceae.g__ph2.---                                      | TimePoint | Baseline | 2.58825174 | 0.70019171 | 67 | 25      | 0.00045545 | 0.00563886 |
| k__Bacteria.p__Firmicutes.c__Clostridia.o__Clostridiales.f__Tissierellaceae.g__Anaerococcus.---                             | TimePoint | Baseline | 2.6198463  | 0.73813406 | 67 | 54      | 0.00072995 | 0.00825165 |
| k__Bacteria.p__Bacteroidetes.c__Bacteroidia.o__Bacteroidales.f__S24.7.---                                                   | TimePoint | Baseline | 3.10474318 | 0.93313838 | 67 | 32      | 0.00145695 | 0.01515226 |
| k__Bacteria.p__Firmicutes.c__Clostridia.o__Clostridiales.f__Veillonellaceae.g__Dialister.---                                | TimePoint | Baseline | 3.41246818 | 0.5635532  | 67 | 48      | 8.15E-08   | 3.53E-06   |
| k__Bacteria.p__Actinobacteria.c__Actinobacteria.o__Actinomycetales.f__Actinomycetaceae.g__Actinomyces.---                   | TimePoint | Baseline | 3.5370887  | 0.73480962 | 67 | 40      | 9.42E-06   | 0.00016331 |
| k__Bacteria.p__Actinobacteria.c__Actinobacteria.o__Actinomycetales.f__Actinomycetaceae.g__Actinomyces.---                   | TimePoint | Baseline | 3.5965985  | 0.82542439 | 67 | 39      | 4.87E-05   | 0.00074415 |
| k__Bacteria.p__Proteobacteria.c__Gammaproteobacteria.o__Enterobacteriales.f__Enterobacteriaceae.g__Enterobacter.---         | TimePoint | Baseline | 3.71459195 | 0.75851527 | 67 | 40      | 6.92E-06   | 0.0001286  |
| k__Bacteria.p__Firmicutes.c__Clostridia.o__Clostridiales.f__Mogilibacteriaceae.g__Mogilibacterium.---                       | TimePoint | Baseline | 3.71807619 | 0.81919018 | 67 | 30      | 2.55E-05   | 0.0004151  |
| k__Bacteria.p__Proteobacteria.c__Deltaproteobacteria.o__Desulfovibrionales.f__Desulfovibrionaceae.g__Desulfovibrio.---      | TimePoint | Baseline | 3.75151126 | 0.75002455 | 67 | 34      | 4.70E-06   | 0.00011098 |
| k__Bacteria.p__Firmicutes.c__Clostridia.o__Clostridiales.f__Tissierellaceae.g__Peptoniphilus.---                            | TimePoint | Baseline | 3.83553204 | 0.53313335 | 67 | 54      | 8.48E-10   | 5.51E-08   |
| k__Bacteria.p__Firmicutes.c__Clostridia.o__Clostridiales.f__Tissierellaceae.g__Tissierella.---                              | TimePoint | Baseline | 3.93676245 | 0.77818093 | 67 | 32      | 3.79E-06   | 9.86E-05   |
| k__Bacteria.p__Actinobacteria.c__Actinobacteria.o__Actinomycetales.f__Corynebacteriaceae.g__Corynebacterium.---             | TimePoint | Baseline | 4.0121202  | 0.81585113 | 67 | 56      | 6.42E-06   | 0.00012836 |
| k__Bacteria.p__Actinobacteria.c__Actinobacteria.o__Actinomycetales.f__Actinomycetaceae.g__Varibaculum.---                   | TimePoint | Baseline | 4.29922977 | 0.65636022 | 67 | 47      | 1.14E-08   | 5.92E-07   |
| k__Bacteria.p__Bacteroidetes.c__Bacteroidia.o__Bacteroidales.f__Porphyromonadaceae.g__Porphyromonas.---                     | TimePoint | Baseline | 4.3830993  | 0.53482038 | 67 | 47      | 1.46E-11   | 1.26E-09   |
| k__Bacteria.p__Fusobacteria.c__Fusobacteria.o__Fusobacteriales.f__Fusobacteriaceae.g__Fusobacterium.---                     | TimePoint | Baseline | 4.72972013 | 0.80859637 | 67 | 35      | 1.83E-07   | 6.80E-06   |
| k__Bacteria.p__Firmicutes.c__Clostridia.o__Clostridiales.f__Tissierellaceae.g__WAL_1855D.---                                | TimePoint | Baseline | 4.98864521 | 0.93081724 | 67 | 37      | 1.22E-06   | 3.96E-05   |
| k__Bacteria.p__Proteobacteria.c__Epsilonproteobacteria.o__Campylobacteriales.f__Campylobacteraceae.g__Campylobacter.---     | TimePoint | Baseline | 5.22411648 | 0.59580821 | 67 | 48      | 1.44E-12   | 1.87E-10   |
| k__Bacteria.p__Bacteroidetes.c__Bacteroidia.o__Bacteroidales.f__Prevotellaceae.g__Prevotella.---                            | TimePoint | Baseline | 6.26793832 | 0.60287445 | 67 | 61      | 2.23E-15   | 5.79E-13   |
