# Supplementary material for: Dysbiosis: An Indicator of COVID-19 Severity in Critically Ill Patients
Source: MDPI journal article supplement (doi:10.3390/ijms232415808), 2022-12-13
Supplement: s1 [file s1]

Supplementary Table S5. ICU-COV(-) versus ICU-COV(+) (MaAsLin2 test)

| feature                                                                                                                       | metadata    | value                 | coef | stderr | N    | N.not.0 | pval     | qval |
|-------------------------------------------------------------------------------------------------------------------------------|-------------|-----------------------|------|--------|------|---------|----------|------|
| k__Bacteria.p__Actinobacteria.c__Actinobacteria.o__Actinomycetales.f__Actinomycetaceae.g__Actinobaculum.---                   | SampleStatu | ICU-COV(-).Patient_RS | -1.5 | 0.5    | 78.0 | 15.0    | 0.0      | 0.0  |
| k__Bacteria.p__Actinobacteria.c__Coriobacteria.o__Coriobacteriales.f__Coriobacteriaceae.---                                   | SampleStatu | ICU-COV(-).Patient_RS | -2.0 | 0.6    | 78.0 | 61.0    | 0.0      | 0.0  |
| k__Bacteria.p__Actinobacteria.c__Coriobacteria.o__Coriobacteriales.f__Coriobacteriaceae.g__Collinsella.---                    | SampleStatu | ICU-COV(-).Patient_RS | -1.3 | 0.4    | 78.0 | 13.0    | 0.0      | 0.0  |
| k__Bacteria.p__Actinobacteria.c__Coriobacteria.o__Coriobacteriales.f__Coriobacteriaceae.g__Collinsella.s__aerofaciens.        | SampleStatu | ICU-COV(-).Patient_RS | -2.5 | 0.5    | 78.0 | 43.0    | 1.14E-05 | 0.0  |
| k__Bacteria.p__Actinobacteria.c__Coriobacteria.o__Coriobacteriales.f__Coriobacteriaceae.g__Eggerthella.s__lenta.---           | SampleStatu | ICU-COV(-).Patient_RS | -1.2 | 0.4    | 78.0 | 20.0    | 0.0      | 0.0  |
| k__Bacteria.p__Actinobacteria.c__Coriobacteria.o__Coriobacteriales.f__Coriobacteriaceae.g__Slackia.---                        | SampleStatu | ICU-COV(-).Patient_RS | -1.4 | 0.5    | 78.0 | 22.0    | 0.0      | 0.0  |
| k__Bacteria.p__Bacteroidetes.c__Bacteroidia.o__Bacteroidales.f__Odoribacteraceae.g__Butyrivimonas.---                         | SampleStatu | ICU-COV(-).Patient_RS | -2.0 | 0.6    | 78.0 | 52.0    | 0.0      | 0.0  |
| k__Bacteria.p__Bacteroidetes.c__Bacteroidia.o__Bacteroidales.f__Rikenellaceae.---                                             | SampleStatu | ICU-COV(-).Patient_RS | -1.5 | 0.5    | 78.0 | 73.0    | 0.0      | 0.0  |
| k__Bacteria.p__Firmicutes.c__Bacilli.o__Lactobacillales.f__Enterococcaceae.g__Enterococcus.---                                | SampleStatu | ICU-COV(-).Patient_RS | -1.2 | 0.4    | 78.0 | 25.0    | 0.0      | 0.0  |
| k__Bacteria.p__Firmicutes.c__Bacilli.o__Lactobacillales.f__Lactobacillaceae.g__Lactobacillus.s__iners.---                     | SampleStatu | ICU-COV(-).Patient_RS | -1.6 | 0.5    | 78.0 | 20.0    | 0.0      | 0.0  |
| k__Bacteria.p__Firmicutes.c__Bacilli.o__Lactobacillales.f__Streptococcaceae.g__Streptococcus.---                              | SampleStatu | ICU-COV(-).Patient_RS | -2.4 | 0.7    | 78.0 | 48.0    | 0.0      | 0.0  |
| k__Bacteria.p__Firmicutes.c__Clostridia.o__Clostridiales.f__Lachnospiraceae.g__Ruminococcus.---                               | SampleStatu | ICU-COV(-).Patient_RS | -1.8 | 0.6    | 78.0 | 37.0    | 0.0      | 0.0  |
| k__Bacteria.p__Firmicutes.c__Clostridia.o__Clostridiales.f__Ruminococcaceae.---                                               | SampleStatu | ICU-COV(-).Patient_RS | -1.4 | 0.5    | 78.0 | 76.0    | 0.0      | 0.0  |
| k__Bacteria.p__Firmicutes.c__Clostridia.o__Clostridiales.f__Ruminococcaceae.g__Oscillospira.---                               | SampleStatu | ICU-COV(-).Patient_RS | -2.2 | 0.6    | 78.0 | 41.0    | 0.0      | 0.0  |
| k__Bacteria.p__Proteobacteria.c__Delta proteobacteria.o__Desulfotribionales.f__Desulfotribionaceae.---                        | SampleStatu | ICU-COV(-).Patient_RS | -1.3 | 0.5    | 78.0 | 35.0    | 0.0      | 0.0  |
| k__Bacteria.p__Proteobacteria.c__Epsilonproteobacteria.o__Campylobacterales.f__Campylobacteraceae.g__Campylobacter.---        | SampleStatu | ICU-COV(-).Patient_RS | -2.3 | 0.6    | 78.0 | 68.0    | 0.0      | 0.0  |
| k__Bacteria.p__Proteobacteria.c__Gammaproteobacteria.o__Pasteurellales.f__Pasteurellaceae.g__Haemophilus.s__parainfluenzae.   | SampleStatu | ICU-COV(-).Patient_RS | -1.4 | 0.5    | 78.0 | 27.0    | 0.0      | 0.0  |
| k__Bacteria.p__Verrucomicrobia.c__Verrucomicrobiae.o__Verrucomicrobiales.f__Verrucomicrobiaceae.g__Akermansia.s__muciniphila. | SampleStatu | ICU-COV(-).Patient_RS | -2.2 | 0.8    | 78.0 | 46.0    | 0.0      | 0.0  |
