# Supplementary material for: Dysbiosis: An Indicator of COVID-19 Severity in Critically Ill Patients
Source: MDPI journal article supplement (doi:10.3390/ijms232415808), 2022-12-13
Supplement: s1 [file s1]

# Supplementary Table S9. ICU-COV(+) (tracheal aspirates vs rectal swabs) (MaAsLin2 test)

| feature                                                                                                                   | metadata          | value                | coef       | stderr      | N  | N.not.0 | pval       | qval       |
|---------------------------------------------------------------------------------------------------------------------------|-------------------|----------------------|------------|-------------|----|---------|------------|------------|
| k_Bacteria.p_Bacteroidetes.c_Bacteroidia.o_Bacteroidales.f_Bacteroidaceae.g_Bacteroides_                                  | SampleStatus_type | ICU-COV(+)Patient_TA | -8.2867712 | 0.59964401  | 71 | 47      | 1.48E-21   | 3.33E-20   |
| k_Bacteria.p_Firmicutes.c_Clostridia.o_Clostridiales.f_Lachnospiraceae_                                                   | SampleStatus_type | ICU-COV(+)Patient_TA | -7.9505433 | 0.46914253  | 71 | 50      | 2.63E-26   | 1.77E-24   |
| k_Bacteria.p_Firmicutes.c_Clostridia.o_Clostridiales.f_Ruminococcaceae_                                                   | SampleStatus_type | ICU-COV(+)Patient_TA | -6.0496189 | 0.371291844 | 71 | 45      | 2.83E-25   | 1.19E-23   |
| k_Bacteria.p_Firmicutes.c_Clostridia.o_Clostridiales_                                                                     | SampleStatus_type | ICU-COV(+)Patient_TA | -5.9741136 | 0.48075646  | 71 | 51      | 2.85E-19   | 4.27E-18   |
| k_Bacteria.p_Firmicutes.c_Clostridia.o_Clostridiales.f_Ruminococcaceae_                                                   | SampleStatus_type | ICU-COV(+)Patient_TA | -5.909147  | 0.1623116   | 71 | 45      | 3.72E-22   | 1.00E-20   |
| k_Bacteria.p_Firmicutes.c_Clostridia.o_Clostridiales.f_Tissierellaceae.g_Peptoniphilus_                                   | SampleStatus_type | ICU-COV(+)Patient_TA | -5.7310967 | 0.30458061  | 71 | 47      | 7.05E-29   | 9.51E-27   |
| k_Bacteria.p_Bacteroidetes.c_Bacteroidia.o_Bacteroidales.f_Rikenellaceae_                                                 | SampleStatus_type | ICU-COV(+)Patient_TA | -5.7097187 | 0.38468287  | 71 | 47      | 3.74E-23   | 1.26E-21   |
| k_Bacteria.p_Firmicutes.c_Clostridia.o_Clostridiales.f_WA01955D_                                                          | SampleStatus_type | ICU-COV(+)Patient_TA | -5.6507597 | 0.75890262  | 71 | 34      | 8.83E-11   | 3.62E-09   |
| k_Bacteria.p_Firmicutes.c_Clostridia.o_Clostridiales.f_Tissierellaceae.g_Anerococcus_                                     | SampleStatus_type | ICU-COV(+)Patient_TA | -5.2724613 | 0.42274728  | 71 | 44      | 2.39E-19   | 4.03E-18   |
| k_Bacteria.p_Firmicutes.c_Clostridia.o_Clostridiales.f_Ruminococcaceae.g_Oscillospira_                                    | SampleStatus_type | ICU-COV(+)Patient_TA | -5.1699054 | 0.53504271  | 71 | 40      | 1.88E-14   | 1.82E-13   |
| k_Bacteria.p_Bacteroidetes.c_Bacteroidia.o_Bacteroidales.f_Porphyromonadaceae.g_Parabacteroides_s_distansis_              | SampleStatus_type | ICU-COV(+)Patient_TA | -4.9272263 | 0.75075509  | 71 | 31      | 8.16E-09   | 2.62E-08   |
| k_Bacteria.p_Firmicutes.c_Clostridia.o_Clostridiales.f_Tissierellaceae.g_Finegoldia_                                      | SampleStatus_type | ICU-COV(+)Patient_TA | -4.8842784 | 0.36076156  | 71 | 44      | 4.18E-21   | 8.07E-20   |
| k_Bacteria.p_Firmicutes.c_Clostridia.o_Clostridiales.f_Lachnospiraceae.g_Blaustia_                                        | SampleStatus_type | ICU-COV(+)Patient_TA | -4.8753308 | 0.61109291  | 71 | 35      | 2.13E-11   | 1.20E-10   |
| k_Bacteria.p_Firmicutes.c_Clostridia.o_Clostridiales.f_Lachnospiraceae.g_Blaustia_                                        | SampleStatus_type | ICU-COV(+)Patient_TA | -4.8630045 | 0.54003243  | 71 | 38      | 1.32E-13   | 2.40E-12   |
| k_Bacteria.p_Firmicutes.c_Clostridia.o_Clostridiales.f_Ruminococcaceae.g_Ruminococcus_                                    | SampleStatus_type | ICU-COV(+)Patient_TA | -4.520925  | 0.63641201  | 71 | 34      | 8.62E-10   | 3.81E-09   |
| k_Bacteria.p_Actinobacteria.c_Actinobacteria.o_Actinomycetales.f_Actinomycetaceae.g_Varibaculum_                          | SampleStatus_type | ICU-COV(+)Patient_TA | -4.4515591 | 0.41307278  | 71 | 42      | 1.95E-16   | 2.63E-15   |
| k_Bacteria.p_Actinobacteria.c_Actinobacteria.o_Actinomycetales.f_Actinomycetaceae_                                        | SampleStatus_type | ICU-COV(+)Patient_TA | -4.3893282 | 0.61071765  | 71 | 35      | 6.09E-10   | 2.74E-09   |
| k_Bacteria.p_Actinobacteria.c_Actinobacteria.o_Actinomycetales.f_Corynebacteriaceae.g_Corynebacterium_                    | SampleStatus_type | ICU-COV(+)Patient_TA | -4.3564675 | 0.69405142  | 71 | 56      | 2.65E-08   | 7.76E-08   |
| k_Bacteria.p_Proteobacteria.c_Deltaproteobacteria.o_Desulfuovibrionales.f_Desulfuovibrionaceae.g_Bilophila_               | SampleStatus_type | ICU-COV(+)Patient_TA | -4.3359229 | 0.44577313  | 71 | 39      | 1.44E-14   | 1.50E-13   |
| k_Bacteria.p_Bacteroidetes.c_Bacteroidia.o_Bacteroidales.f_Odoribacteraceae.g_Butyrimonas_                                | SampleStatus_type | ICU-COV(+)Patient_TA | -4.3292919 | 0.53795856  | 71 | 36      | 1.64E-11   | 9.60E-11   |
| k_Bacteria.p_Verrucomicrobia.c_Verrucomicrobiales.o_Verrucomicrobiales.f_Verrucomicrobiaceae.g_Akkermansia_s_muciniphila_ | SampleStatus_type | ICU-COV(+)Patient_TA | -4.3039086 | 0.74479425  | 71 | 32      | 1.99E-07   | 5.59E-07   |
| k_Bacteria.p_Bacteroidetes.c_Bacteroidia.o_Bacteroidales.f_S247_                                                          | SampleStatus_type | ICU-COV(+)Patient_TA | -4.2642052 | 0.71444011  | 71 | 31      | 2.22E-07   | 6.11E-07   |
| k_Bacteria.p_Firmicutes.c_Clostridia.o_Clostridiales.f_Ruminococcaceae.g_Ruminococcus_                                    | SampleStatus_type | ICU-COV(+)Patient_TA | -4.228947  | 0.47707324  | 71 | 41      | 5.23E-13   | 3.72E-12   |
| k_Bacteria.p_Bacteroidetes.c_Bacteroidia.o_Bacteroidales.f_Porphyromonadaceae.g_Porphyromonas_                            | SampleStatus_type | ICU-COV(+)Patient_TA | -4.1896795 | 0.5352338   | 71 | 45      | 4.83E-11   | 2.29E-09   |
| k_Bacteria.p_Firmicutes.c_Clostridia.o_Clostridiales.f_Tissierellaceae_                                                   | SampleStatus_type | ICU-COV(+)Patient_TA | -4.15535   | 0.63252827  | 71 | 31      | 7.95E-09   | 2.62E-08   |
| k_Bacteria.p_Firmicutes.c_Clostridia.o_Clostridiales.f_Veillonellaceae.g_Dialister_                                       | SampleStatus_type | ICU-COV(+)Patient_TA | -4.0904659 | 0.49205357  | 71 | 50      | 5.35E-12   | 3.28E-11   |
| k_Bacteria.p_Firmicutes.c_Clostridia.o_Clostridiales.f_Lachnospiraceae_                                                   | SampleStatus_type | ICU-COV(+)Patient_TA | -0.824435  | 0.44343859  | 71 | 51      | 1.26E-13   | 1.06E-12   |
| k_Bacteria.p_Proteobacteria.c_Deltaproteobacteria.o_Desulfuovibrionales.f_Desulfuovibrionaceae.g_Desulfuovibrio_          | SampleStatus_type | ICU-COV(+)Patient_TA | -4.0146626 | 0.59304937  | 71 | 32      | 3.47E-09   | 1.30E-08   |
| k_Bacteria.p_Proteobacteria.c_Betaproteobacteria.o_Burkholderiales.f_Alcaligenaceae.g_Sutterella_                         | SampleStatus_type | ICU-COV(+)Patient_TA | -3.9809993 | 0.46169295  | 71 | 38      | 1.45E-12   | 9.35E-12   |
| k_Bacteria.p_Proteobacteria.c_Gammaproteobacteria.o_Enterobacteriales.f_Enterobacteriaceae.g_Escherichia_                 | SampleStatus_type | ICU-COV(+)Patient_TA | -3.9572583 | 0.56343632  | 71 | 38      | 1.32E-09   | 1.06E-08   |
| k_Bacteria.p_Actinobacteria.c_Coriobacteriales.o_Coriobacteriales.f_Coriobacteriaceae_                                    | SampleStatus_type | ICU-COV(+)Patient_TA | -3.9526458 | 0.41217575  | 71 | 43      | 5.55E-14   | 2.29E-13   |
| k_Bacteria.p_Firmicutes.c_Clostridia.o_Clostridiales.f_Veillonellaceae.g_Phacellobacterium_                               | SampleStatus_type | ICU-COV(+)Patient_TA | -3.7926764 | 0.70736312  | 71 | 26      | 1.03E-06   | 2.63E-06   |
| k_Bacteria.p_Firmicutes.c_Erysipelotrichi.o_Erysipelotrichales.f_Erysipelotrichaceae_                                     | SampleStatus_type | ICU-COV(+)Patient_TA | -3.7505981 | 0.56346387  | 71 | 33      | 5.55E-09   | 1.87E-08   |
| k_Bacteria.p_Bacteroidetes.c_Bacteroidia.o_Bacteroidales.f_Prevotellaceae.g_Prevotella_                                   | SampleStatus_type | ICU-COV(+)Patient_TA | -3.7467344 | 0.55858441  | 71 | 65      | 4.40E-09   | 1.59E-08   |
| k_Bacteria.p_Actinobacteria.c_Coriobacteriales.o_Coriobacteriales.f_Collinsella_s_aerofaciens_                            | SampleStatus_type | ICU-COV(+)Patient_TA | -3.7190449 | 0.51509247  | 71 | 33      | 7.70E-07   | 2.00E-06   |
| k_Bacteria.p_Proteobacteria.c_Epsilonproteobacteria.o_Campylobacteriales.f_Campylobacteriaceae.g_Campylobacter_           | SampleStatus_type | ICU-COV(+)Patient_TA | -3.6980476 | 0.52055091  | 71 | 57      | 8.81E-10   | 3.81E-09   |
| k_Bacteria.p_Bacteroidetes.c_Bacteroidia.o_Bacteroidales.f_Bacteroidaceae.g_Bacteroides_s_uniformis_                      | SampleStatus_type | ICU-COV(+)Patient_TA | -3.6643235 | 0.53922584  | 71 | 40      | 2.04E-15   | 2.51E-14   |
| k_Bacteria.p_Bacteroidetes.c_Bacteroidia.o_Bacteroidales.f_Porphyromonadaceae.g_Parabacteroides_                          | SampleStatus_type | ICU-COV(+)Patient_TA | -3.4066543 | 0.38625817  | 71 | 38      | 6.36E-13   | 4.29E-12   |
| k_Bacteria.p_Firmicutes.c_Clostridia.o_Clostridiales.f_Christensenellaceae_                                               | SampleStatus_type | ICU-COV(+)Patient_TA | -3.3553536 | 0.63749566  | 71 | 29      | 1.52E-06   | 3.79E-06   |
| k_Bacteria.p_Bacteroidetes.c_Bacteroidia.o_Bacteroidales.f_Odoribacteriaceae.g_Odoribacter_                               | SampleStatus_type | ICU-COV(+)Patient_TA | -3.2294475 | 0.44507413  | 71 | 28      | 1.76E-06   | 4.11E-06   |
| k_Bacteria.p_Firmicutes.c_Clostridia.o_Clostridiales.f_Peptostreptococcaceae_                                             | SampleStatus_type | ICU-COV(+)Patient_TA | -2.9723278 | 0.68467198  | 71 | 22      | 4.75E-05   | 8.70E-05   |
| k_Bacteria.p_Firmicutes.c_Clostridia.o_Clostridiales.f_Ruminococcaceae.g_Faecalibacterium_s_prausnitzii_                  | SampleStatus_type | ICU-COV(+)Patient_TA | -2.7309236 | 0.36386706  | 71 | 35      | 1.60E-10   | 8.32E-10   |
| k_Bacteria.p_Firmicutes.c_Clostridia.o_Clostridiales.f_Mogibacteriaceae_                                                  | SampleStatus_type | ICU-COV(+)Patient_TA | -2.7053045 | 0.60293829  | 71 | 48      | 2.81E-05   | 5.68E-05   |
| k_Bacteria.p_Firmicutes.c_Clostridia.o_Clostridiales.f_Tissierellaceae.g_pH2_                                             | SampleStatus_type | ICU-COV(+)Patient_TA | -2.6378576 | 0.57644868  | 71 | 25      | 2.03E-05   | 4.29E-05   |
| k_Bacteria.p_Firmicutes.c_Clostridia.o_Clostridiales.f_Ruminococcaceae.g_Oscillospira_                                    | SampleStatus_type | ICU-COV(+)Patient_TA | -2.616795  | 0.47406229  | 71 | 30      | 5.56E-07   | 1.47E-06   |
| k_Bacteria.p_Firmicutes.c_Clostridia.o_Clostridiales.f_Lachnospiraceae.g_Megaphasma_                                      | SampleStatus_type | ICU-COV(+)Patient_TA | -2.6080445 | 0.42082352  | 71 | 32      | 7.70E-07   | 2.00E-06   |
| k_Bacteria.p_Firmicutes.c_Clostridia.o_Clostridiales.f_Lachnospiraceae.g_Coproccoccus_                                    | SampleStatus_type | ICU-COV(+)Patient_TA | -2.4597653 | 0.60334565  | 71 | 21      | 0.00012041 | 0.0021389  |
| k_Bacteria.p_Firmicutes.c_Erysipelotrichi.o_Erysipelotrichales.f_Erysipelotrichaceae.g_Eubacterium_s_dolichum_            | SampleStatus_type | ICU-COV(+)Patient_TA | -2.3845685 | 0.53556361  | 71 | 24      | 3.19E-04   | 6.23E-05   |
| k_Bacteria.p_Firmicutes.c_Clostridia.o_Clostridiales.f_Ruminococcaceae.g_Faecalibacterium_                                | SampleStatus_type | ICU-COV(+)Patient_TA | -2.3316698 | 0.45738796  | 71 | 27      | 2.87E-06   | 6.69E-06   |
| k_Bacteria.p_Firmicutes.c_Clostridia.o_Clostridiales_                                                                     | SampleStatus_type | ICU-COV(+)Patient_TA | -2.3311736 | 0.57587298  | 71 | 26      | 0.00013301 | 0.0020332  |
| k_Bacteria.p_Firmicutes.c_Clostridia.o_Clostridiales.f_Ruminococcaceae.g_Ruminococcus_                                    | SampleStatus_type | ICU-COV(+)Patient_TA | -2.2880445 | 0.42082352  | 71 | 27      | 7.70E-07   | 2.00E-06   |
| k_Bacteria.p_Bacteroidetes.c_Bacteroidia.o_Bacteroidales.f_Barnesiellaceae_                                               | SampleStatus_type | ICU-COV(+)Patient_TA | -2.2717864 | 0.35526289  | 71 | 33      | 1.63E-08   | 4.90E-08   |
| k_Bacteria.p_Firmicutes.c_Clostridia.o_Clostridiales.f_Clostridiaceae.g_Clostridium_                                      | SampleStatus_type | ICU-COV(+)Patient_TA | -2.2667556 | 0.56762195  | 71 | 21      | 0.00016646 | 0.0027423  |
| k_Bacteria.p_Bacteroidetes.c_Bacteroidia.o_Bacteroidales.f_Prevotellaceae.g_Prevotella_s_copri_                           | SampleStatus_type | ICU-COV(+)Patient_TA | -2.2303709 | 0.60404629  | 71 | 21      | 0.00086607 | 0.012628   |
| k_Bacteria.p_Bacteroidetes.c_Bacteroidia.o_Bacteroidales.f_Porphyromonadaceae.g_Porphyromonas_s_endodontalis_             | SampleStatus_type | ICU-COV(+)Patient_TA | -2.2165126 | 0.45615911  | 71 | 26      | 7.11E-06   | 1.60E-05   |
| k_Bacteria.p_Firmicutes.c_Clostridia.o_Clostridiales.f_Christensenellaceae_                                               | SampleStatus_type | ICU-COV(+)Patient_TA | -2.1837105 | 0.41726265  | 71 | 28      | 1.76E-06   | 4.11E-06   |
| k_Bacteria.p_Proteobacteria.c_Deltaproteobacteria.o_Desulfuovibrionales.f_Desulfuovibrionaceae_                           | SampleStatus_type | ICU-COV(+)Patient_TA | -2.1827859 | 0.44443493  | 71 | 26      | 5.84E-06   | 1.34E-05   |
| k_Bacteria.p_Firmicutes.c_Clostridia.o_Clostridiales.f_Christensenellaceae_                                               | SampleStatus_type | ICU-COV(+)Patient_TA | -2.1780044 | 0.51191825  | 71 | 23      | 6.47E-05   | 0.0001796  |
| k_Bacteria.p_Bacteroidetes.c_Bacteroidia.o_Bacteroidales.f_Bacteroidaceae.g_Bacteroides_s_fragilis_                       | SampleStatus_type | ICU-COV(+)Patient_TA | -2.1579691 | 0.48598914  | 71 | 25      | 3.33E-05   | 6.42E-05   |
| k_Bacteria.p_Firmicutes.c_Bacilli.o_Lactobacillales.f_Lactobacillaceae.g_Lactobacillus_                                   | SampleStatus_type | ICU-COV(+)Patient_TA | -2.1105568 | 0.5611187   | 71 | 19      | 0.00035975 | 0.0005508  |
| k_Bacteria.p_Actinobacteria.c_Actinobacteria.o_Actinomycetales.f_Actinomycetaceae.g_Arcanobacterium_                      | SampleStatus_type | ICU-COV(+)Patient_TA | -2.0828789 | 0.5767762   | 71 | 18      | 0.00057357 | 0.0078792  |
| k_Bacteria.p_Firmicutes.c_Clostridia.o_Clostridiales.f_Veillonellaceae.g_Megaphasma_                                      | SampleStatus_type | ICU-COV(+)Patient_TA | -2.078426  | 0.77820436  | 71 | 30      | 0.01160862 | 0.0182751  |
| k_Archaea.p_Euryarchaeota.c_Methanobacteria.o_Methanobacteriales.f_Methanobacteriaceae.g_Methanobrevibacter_              | SampleStatus_type | ICU-COV(+)Patient_TA | -1.9677717 | 0.43378714  | 71 | 24      | 2.35E-05   | 4.81E-05   |
| k_Bacteria.p_Bacteroidetes.c_Bacteroidia.o_Bacteroidales.f_Paraprevotellaceae.g_Paraprevotella_                           | SampleStatus_type | ICU-COV(+)Patient_TA | -1.9627792 | 0.50866281  | 71 | 20      | 0.00025344 | 0.0004252  |
| k_Bacteria.p_Alphaproteobacteria.c_Alphaproteobacteria.o_RF32_                                                            | SampleStatus_type | ICU-COV(+)Patient_TA | -1.9418407 | 0.50086606  | 71 | 20      | 0.00023834 | 0.00038034 |
| k_Bacteria.p_Lentisphaerae.c_Lentisphaera.o_Victivallales.f_Victivallaceae_                                               | SampleStatus_type | ICU-COV(+)Patient_TA | -1.939306  | 0.48198613  | 71 | 21      | 0.00014471 | 0.0025046  |
| k_Bacteria.p_Firmicutes.c_Clostridia.o_Clostridiales.f_Peptococcaceae.g_Peptococcus_                                      | SampleStatus_type | ICU-COV(+)Patient_TA | -1.8767444 | 0.41097859  | 71 | 30      | 2.10E-05   | 4.37E-05   |
| k_Bacteria.p_Firmicutes.c_Clostridia.o_Clostridiales.f_Mogibacteriaceae.g_Mogibacterium_                                  | SampleStatus_type | ICU-COV(+)Patient_TA | -1.8005643 | 0.80000114  | 71 | 38      | 0.02759401 | 0.0304187  |
| k_Bacteria.p_Firmicutes.c_Bacilli.o_Lactobacillales.f_Enterococcaceae.g_Enterococcus_                                     | SampleStatus_type | ICU-COV(+)Patient_TA | -1.7137134 | 0.4387927   | 71 | 20      | 0.00021643 | 0.0035203  |
| k_Bacteria.p_Bacteroidetes.c_Bacteroidia.o_Bacteroidales.f_Prevotellaceae.g_Prevotella_                                   | SampleStatus_type | ICU-COV(+)Patient_TA | -1.664182  | 0.61751904  | 71 | 12      | 0.0083467  | 0.0105549  |
| k_Bacteria.p_Bacteroidetes.c_Bacteroidia.o_Bacteroidales.f_Bacteroidaceae.g_Bacteroides_s_caccae_                         | SampleStatus_type | ICU-COV(+)Patient_TA | -1.6699945 | 0.3381876   | 71 | 25      | 7.45E-06   | 1.65E-05   |
| k_Bacteria.p_Synergistetes.c_Synergistales.f_Deфиsuovibrionaceae.g_Deфиsuovibrionaceae_                                   | SampleStatus_type | ICU-COV(+)Patient_TA | -1.537473  | 0.43130071  | 71 | 18      | 0.00066645 | 0.0096968  |
| k_Bacteria.p_Actinobacteria.c_Actinobacteria.o_Actinomycetales.f_Actinomycetaceae.g_Actinobaculum_                        | SampleStatus_type | ICU-COV(+)Patient_TA | -1.5324023 | 0.52696866  | 71 | 14      | 0.00489897 | 0.0063477  |
| k_Bacteria.p_Firmicutes.c_Clostridia.o_Clostridiales.f_Lachnospiraceae.g_Dorea_                                           | SampleStatus_type | ICU-COV(+)Patient_TA | -1.462538  | 0.51580998  | 71 | 13      | 0.01959998 | 0.0076148  |
| k_Bacteria.p_Bacteroidetes.c_Bacteroidia.o_Bacteroidales.f_Prevotellaceae.g_Prevotella_s_stercora_                        | SampleStatus_type | ICU-COV(+)Patient_TA | -1.4599315 | 0.56545585  | 71 | 11      | 0.01193362 | 0.0139112  |
| k_Bacteria.p_Firmicutes.c_Erysipelotrichi.o_Erysipelotrichales.f_Erysipelotrichaceae.g_Eubacterium_s_biforme_             | SampleStatus_type | ICU-COV(+)Patient_TA | -1.4430009 | 0.36864006  | 71 | 21      | 0.00021003 | 0.0034578  |
| k_Bacteria.p_Actinobacteria.c_Coriobacteriales.o_Coriobacteriales.f_Coriobacteriaceae.g_Eggerthella_s_lenta_              | SampleStatus_type | ICU-COV(+)Patient_TA | -1.4139975 | 0.37868074  | 71 | 19      | 0.00037649 | 0.0005821  |
| k_Bacteria.p_Firmicutes.c_Clostridia.o_Clostridiales.f_Lachnospiraceae.g_Coproccoccus_                                    | SampleStatus_type | ICU-COV(+)Patient_TA | -1.4089167 | 0.3207781   | 71 | 23      | 3.96E-05   | 7.53E-05   |
| k_Bacteria.p_Bacteroidetes.c_Bacteroidia.o_Bacteroidales.f_Paraprevotellaceae_                                            | SampleStatus_type | ICU-COV(+)Patient_TA | -1.3183904 | 0.47988387  | 71 | 12      | 0.00765921 | 0.0092612  |
| k_Bacteria.p_Firmicutes.c_Clostridia.o_Clostridiales.f_Tissierellaceae.g_Collinsella_                                     | SampleStatus_type | ICU-COV(+)Patient_TA | -1.2771052 | 0.36877408  | 71 | 17      | 0.00092149 | 0.0133765  |
| k_Bacteria.p_Actinobacteria.c_Coriobacteriales.o_Coriobacteriales.f_Coriobacteriaceae.g_Collinsella_                      | SampleStatus_type | ICU-COV(+)Patient_TA | -1.2765225 | 0.46107798  | 71 | 13      | 0.00722445 | 0.0088638  |
| k_Bacteria.p_Actinobacteria.c_Coriobacteriales.o_Coriobacteriales.f_Coriobacteriaceae.g_Gallicola_                        | SampleStatus_type | ICU-COV(+)Patient_TA | -1.271658  | 0.42822161  | 71 | 14      | 0.00409848 | 0.0053718  |
| k_Bacteria.p_Actinobacteria.c_Coriobacteriales.o_Coriobacteriales.f_Coriobacteriaceae.g_Sladkia_                          | SampleStatus_type | ICU-COV(+)Patient_TA | -1.2674095 | 0.37355017  | 71 | 13      | 0.00415111 | 0.0052578  |
| k_Bacteria.p_Synergistetes.c_Synergistales.o_Synergistales.f_Synergistaceae.g_Synergistes_                                | SampleStatus_type | ICU-COV(+)Patient_TA | -1.2076852 | 0.42996742  | 71 | 12      | 0.00645527 | 0.0081572  |
| k_Bacteria.p_Actinobacteria.c_Actinobacteria.o_Bifidobacteriales.f_Bifidobacteriaceae.g_Bifidobacterium_                  | SampleStatus_type | ICU-COV(+)Patient_TA | -1.1415674 | 0.33563536  | 71 | 16      | 0.00122751 | 0.0170789  |
| k_Bacteria.p_Firmicutes.c_Bacilli.o_Lactobacillales.f_Lactobacillaceae.g_Lactobacillus_s_iners_                           | SampleStatus_type | ICU-COV(+)Patient_TA | -1.129518  | 0.32763328  | 71 | 17      | 0.00096802 | 0.0139025  |
| k_Bacteria.p_Firmicutes.c_Clostridia.o_Clostridiales.f_Lachnospiraceae.g_Dorea_                                           | SampleStatus_type | ICU-COV(+)Patient_TA | -1.1179499 | 0.32907674  | 71 | 17      | 0.00113354 | 0.0161802  |
| k_Bacteria.p_Bacteroidetes.c_Bacteroidia.o_Bacteroidales_                                                                 | SampleStatus_type | ICU-COV(+)Patient_TA | -1.1043976 | 0.44075483  | 71 | 18      | 0.0145844  | 0.0165407  |
| k_Bacteria.p_Firmicutes.c_Clostridia.o_Clostridiales.f_Peptostreptococcaceae.g_Peptostreptococcus_s_anaerobius_           | SampleStatus_type | ICU-COV(+)Patient_TA | -1.0164753 | 0.33642942  | 71 | 13      | 0.00686887 | 0.00836108 |
| k_Bacteria.p_Firmicutes.c_Clostridia.o_Clostridiales.f_Veillonellaceae.g_Acidimicrobium_                                  | SampleStatus_type | ICU-COV(+)Patient_TA | -1.0151045 | 0.33589868  | 71 | 14      | 0.00352114 | 0.00460015 |
| k_Bacteria.p_Firmicutes.c_Erysipelotrichi.o_Erysipelotrichales.f_Erysipelotrichaceae.g_Catenibacterium_                   | SampleStatus_type | ICU-COV(+)Patient_TA | -0.9399918 | 0.36882142  | 71 | 11      | 0.0130431  | 0.0149222  |
| k_Bacteria.p_Bacteroidetes.c_Bacteroidia.o_Bacteroidales.f_Bacteroidaceae.g_Bacteroides_s_plebeius_                       | SampleStatus_type | ICU-COV(+)Patient_TA | -0.9171311 | 0.44439506  | 71 | 13      | 0.04280232 | 0.0458589  |
| k_Bacteria.p_Bacteroidetes.c_Bacteroidia.o_Bacteroidales.f_Bacteroidaceae.g_Bacteroides_s_ovatus_                         | SampleStatus_type | ICU-COV(+)Patient_TA | -0.9061393 | 0.289144    |    |         |            |            |
