# Supplementary material for: Dysbiosis: An Indicator of COVID-19 Severity in Critically Ill Patients
Source: Int J Mol Sci. 2022 Dec 13;23(24):15808. doi: 10.3390/ijms232415808 (PMC9779860; doi:10.3390/ijms232415808)
Supplement: Supplementary file 1 [file ijms-23-15808-s001.zip]

Archive with 10 entries (10 files):
- supplementary Figures.pdf
- Supplementary_TableS1_ATB.pdf
- Supplementary_TableS2_ClinicalStat.pdf
- Supplementary_TableS3_HC_ICU.pdf
- Supplementary_TableS4_HC_COVID.pdf
- Supplementary_TableS5_ICU_COVID.pdf
- Supplementary_TableS6_ICU_ALLTP.pdf
- Supplementary_TableS7_COVID_ALLTP.pdf
- Supplementary_TableS8_COVID_TA_ALLTP.pdf
- Supplementary_TableS9_COVID_RS_TA.pdf
